# Supplementary material for: Effects of Fullerenol Nanoparticles on Rat Oocyte Meiosis Resumption
Source: MDPI journal article supplement (doi:10.3390/ijms19030699), 2018-03-01
Supplement: s1 [file s1]

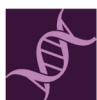

## Supplementary Materials: Effects of Fullerenol Nanoparticles on Rat Oocyte Meiosis Resumption

Runhong Lei, Xue Bai, Yanan Chang, Juan Li, Yanxia Qin, Weihong Gu, Kui Chen, Shibo Xia, Jiaxin Zhang, Zhenbo Wang,\* and Gengmei Xing\*

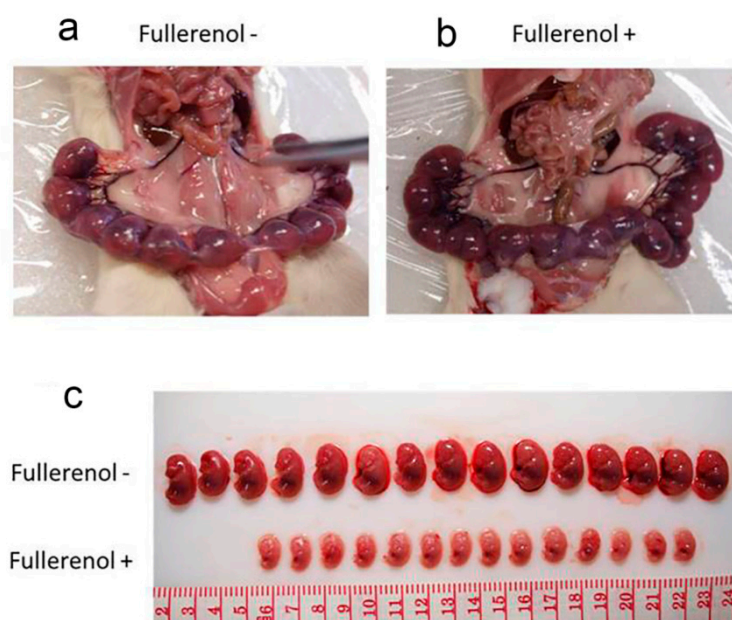

**Figure S1.** Uteri and fetuses from female rats treated with or without fullerenol. Fullerenol was dissolved in normal saline (25.370 mg/kg body weight) and administered to female rats by tail intravenous injection for 3 consecutive days every week. After a 12-week treatment, copulations between normal males and fullerenol-treated females were initiated. Females were euthanized 18 days after treatment, and the uteri were collected. Fetal development degree was recorded. Uterus of (a) control and (b) fullerenol-treated rats. Darker color was observed after fullerenol treatment. (c) Fetal development in both groups. Smaller fetus was observed after fullerenol treatment ( $n = 3$  in each group).

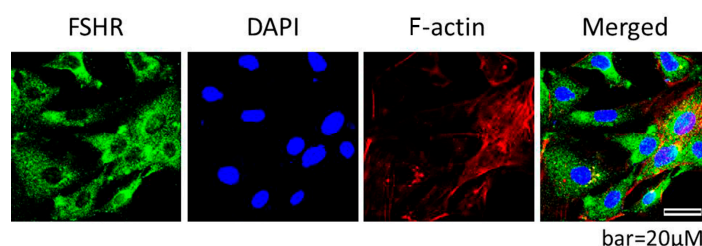

**Figure S2.** Immunofluorescent staining of follicle-stimulating hormone receptor (FSHR) in granulosa cells. Freshly isolated granulosa cells were routinely cultured for 4 days to attach and then fixed in paraformaldehyde (PFA). Identification with specific cell type marker FSHR indicated the high purity of granulosa cells (green, scale bar: 20  $\mu\text{m}$ ). Blue and red color indicate nuclear staining and F-actin skeleton, respectively. Imaging was repeated three times with similar results.

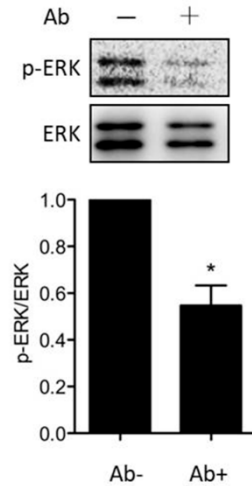

**Figure S3.** Extracellular domain-targeted anti-epidermal growth factor receptor (EGFR) antibody reduced phosphorylated-extracellular signal-regulated kinase 1 and 2 (p-ERK1/2) activation in granulosa cells. Freshly isolated oocyte-granulosa cell complexes (OGCs) were cultured in M2 medium with or without 2  $\mu\text{g/mL}$  antibody for 2 h, and then granulosa cells were harvested after hyaluronidase treatment for immunoblotting analysis. Ab, extracellular domain-targeted anti-EGFR antibody. Data are shown as mean  $\pm$  standard deviation (SD) from three replicates. Typical images are presented.

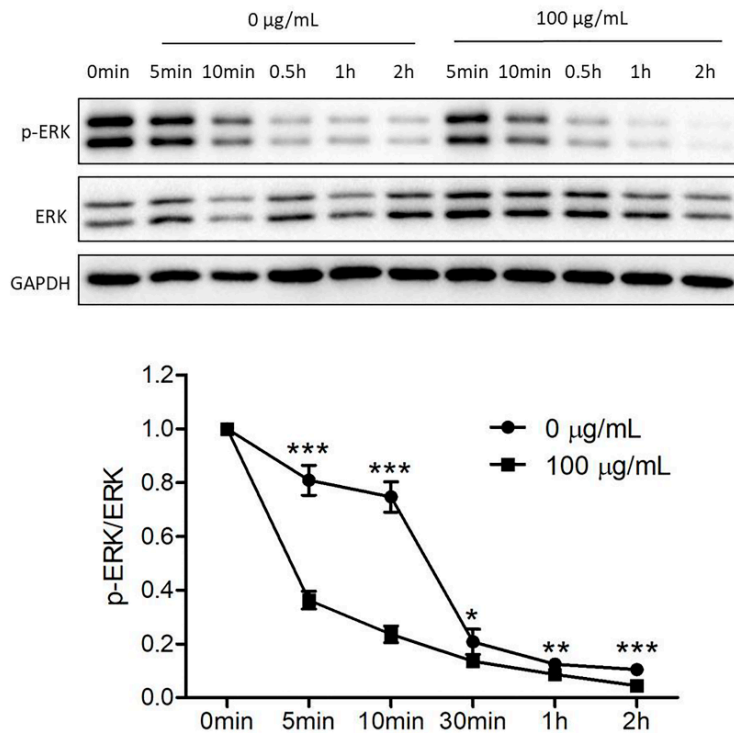

**Figure S4.** Time-course of extracellular signal-regulated kinase 1 and 2 (ERK1/2) activation in granulosa cells after fullereneol treatment. Freshly isolated oocyte-granulosa cell complexes (OGCs) were cultured in M2 medium with or without 100  $\mu\text{g/mL}$  fullereneol for different times, and then granulosa cells were harvested after removing oocytes using hyaluronidase treatment for immunoblotting analysis. Data are shown as mean  $\pm$  standard deviation (SD) from three replicates. Typical images are presented.

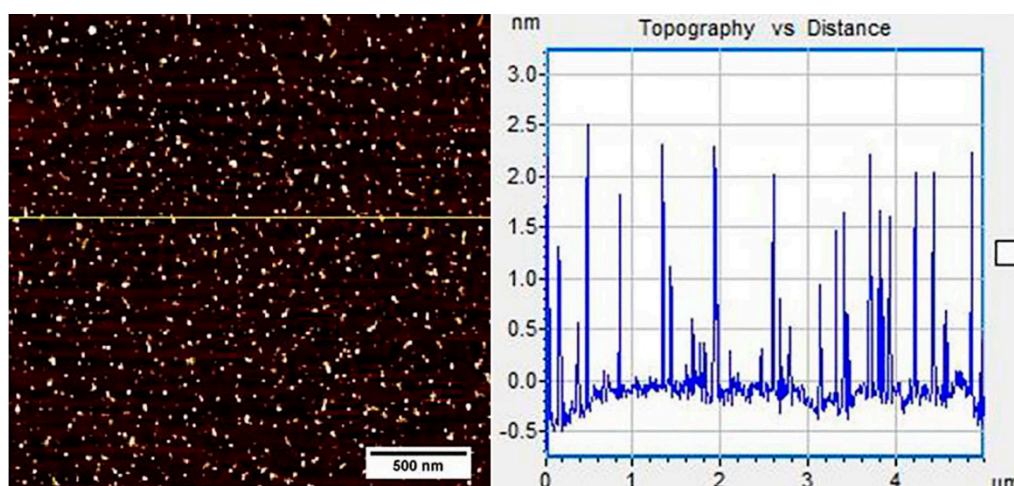

**Figure S5.** Characterization of fullereneol nanoparticles using atomic force microscopy (AFM). Fullereneol nanoparticles were dissolved in phosphate-buffered saline (PBS) and ultrasonically processed. Newly cleaved mica was pretreated with 0.1 M magnesium chloride (MgCl<sub>2</sub>), rinsed with deionized water and then dried before nanoparticles deposition. AFM (Agilent 5500, Santa Clara, CA, USA) imaging was performed under air condition and AC mode (tapping mode). High-quality (HQ): NSC15/ALBS probes with nominal spring constant of K = 40 N/m from Mikromasch probes were used. Settings: amplitude, 3–6 V; speed, 0.8 ln/s; scan size, 10 × 10 μm; and range, 1.5 μm. Images were processed off-line using inherent PicoImage software.

**Table S1.** RT-PCR Primers of *CX43* and *GAPDH*

| Gene name    | Primers                                                                    |
|--------------|----------------------------------------------------------------------------|
| <i>CX43</i>  | Forward: 5'-CTCACGTCCCACGGAGAAAA-3',<br>Reverse: 5'-CGCGATCCTTAACGCCTTG-3' |
| <i>GAPDH</i> | Forward: 5'-TACCCACGGCAAGTTCAACG-3',<br>Reverse: 5'-CACCAGCATCACCCATTG-3'  |

**Table S2.** RT-PCR protocol

| Reverse Transcription                                                                               |             |
|-----------------------------------------------------------------------------------------------------|-------------|
| 1. Prepare the following mixture in each tube:                                                      |             |
| Total RNA                                                                                           | 3 μg        |
| Olig dT                                                                                             | 2 μl        |
| DEPC H <sub>2</sub> O                                                                               | to 14 μl    |
| 2. Incubate the samples at 70°C for 5 min and then on ice for at least 1 min.                       |             |
| 3. Prepare reaction master mixture. For each reaction:                                              |             |
| RNase inhibitor                                                                                     | 0.7 μl      |
| M-MLV buffer                                                                                        | 5 μl        |
| M-MLV                                                                                               | 1 μl        |
| dNTP                                                                                                | 1 μl        |
| ddH <sub>2</sub> O                                                                                  | to 25 μl    |
| 4. Incubate the tubes at 37°C for 90 min, heat inactivate at 70°C for 5 min, and then chill on ice. |             |
| 5. Store the cDNA at -20°C until use for real-time PCR.                                             |             |
| Real-time PCR                                                                                       |             |
| 1. Prepare the following mixture in each tube:                                                      |             |
| cDNA                                                                                                | 2 μl        |
| Primer (forward and reverse)                                                                        | 1 μl + 1 μl |

|                       |               |
|-----------------------|---------------|
| dNTP                  | 1 $\mu$ l     |
| Buffer                | 5 $\mu$ l     |
| DNA polymerase        | 0.5 $\mu$ l   |
| DEPC H <sub>2</sub> O | to 25 $\mu$ l |

2. Set up the experiment and the following PCR program as follow.

- a. 95°C 3 min, 1 cycle
- b. 95 °C 30 s -> 55 °C 30 s -> 72 °C 1 min, 34 cycles
- c. 72°C 5 min, 1 cycle

3. After PCR is finished, remove the tubes from the machine. The PCR specificity is examined by 1% agarose gel using 5  $\mu$ l from each reaction.

---
